# Supplementary material for: Theoretical design and characterization of high-efficiency organic dyes with different electron-withdrawing groups based on C275 toward dye-sensitized solar cells
Source: Royal Society of Chemistry journal article supplement (doi:10.1039/c6nj01731b), 2016-01-01
Supplement: c6nj01731b1.pdf [file c6nj01731b1.pdf]

## Electronic Supplementary Information

### Theoretical design and characterization of high-efficiency organic dyes with different electron-withdrawing groups based on C275 toward dye-sensitized solar cells

Shuang-Bao Li<sup>a</sup>, Dong-Mei Gu<sup>a</sup>, Ji Zhang<sup>b</sup>, Yun Geng<sup>a\*</sup>, Min Zhang<sup>a</sup>, Zhong-Min Su<sup>a\*</sup>

<sup>a</sup> Institute of Functional Material Chemistry, College of Chemistry, Northeast Normal University, Changchun 130021, China

<sup>b</sup> College of Chemistry and Life Science, Changchun University of Technology, Changchun 130012, China

\*Corresponding author: Yun Geng, E-mail: [gengy575@nenu.edu.cn](mailto:gengy575@nenu.edu.cn);

Prof. Zhong-Min Su, E-mail: [zmsu@nenu.edu.cn](mailto:zmsu@nenu.edu.cn)

**Table S1** The maximum absorption wavelength  $E_{\lambda}$  of **C275** calculated by different functionals with the 6-311G\*\* basis set compared with experimental value.

**Fig. S1.** Illustration of the frontier molecular orbitals of organic dye **C275** and dyes **1-7** obtained at B3LYP/6-311G\*\* level in gas phase with the isodensity surface of 0.01 au.

**Fig. S2.** The distance between dye cation hole and TiO<sub>2</sub> surface of dye **1**, **2**, **4** and **6**.

**Fig. S3.** Total and Partial Density of State (DOS) for dyes **1-7** and **C275** adsorbed on (TiO<sub>2</sub>)<sub>38</sub> cluster. The dash line intercepts with the energy axis correspond to calculated  $E_{CB}$  edges.

**Table S1** The maximum absorption wavelength  $\lambda_{\text{max}}$ (nm) of **C275** calculated by different functionals with the 6-311G\*\* basis set compared with experimental value.

| Functional                  | B3LYP | MPW1PW91 | PBE0 | MPW1K | BHandHLYP | M062X | CAM-B3LYP | LC- $\omega$ PBE | LC-BLYP | $\omega$ B97X | $\omega$ B97XD | Exp. |
|-----------------------------|-------|----------|------|-------|-----------|-------|-----------|------------------|---------|---------------|----------------|------|
| $\lambda_{\text{max}}$ (nm) | 693   | 644      | 642  | 543   | 522       | 505   | 505       | 440              | 437     | 455           | 483            | 536  |

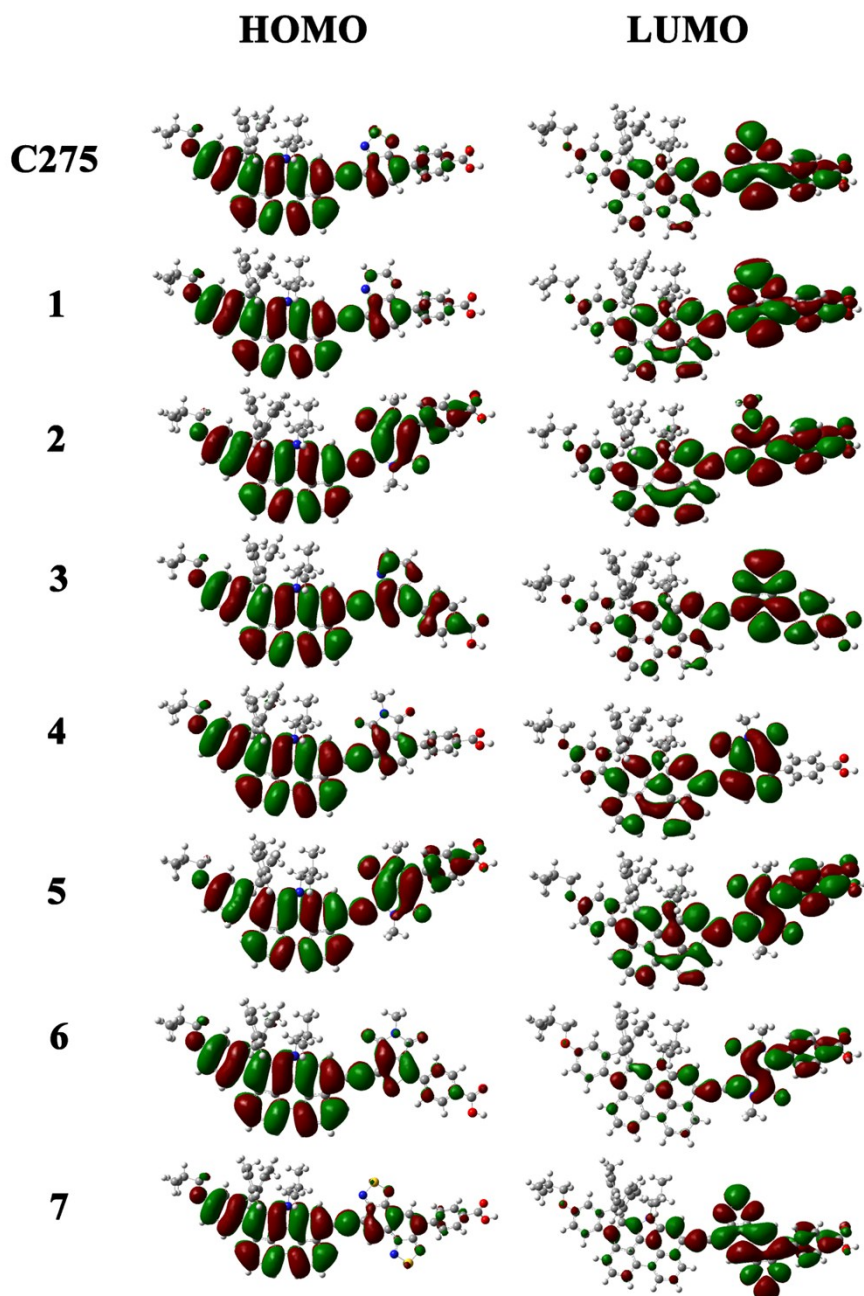

**Fig.S1.** Illustration of the frontier molecular orbitals of organic dye **C275** and dyes **1-7** obtained at B3LYP/6-311G\*\*level in gas phase with the isodensity surface of 0.01 au.

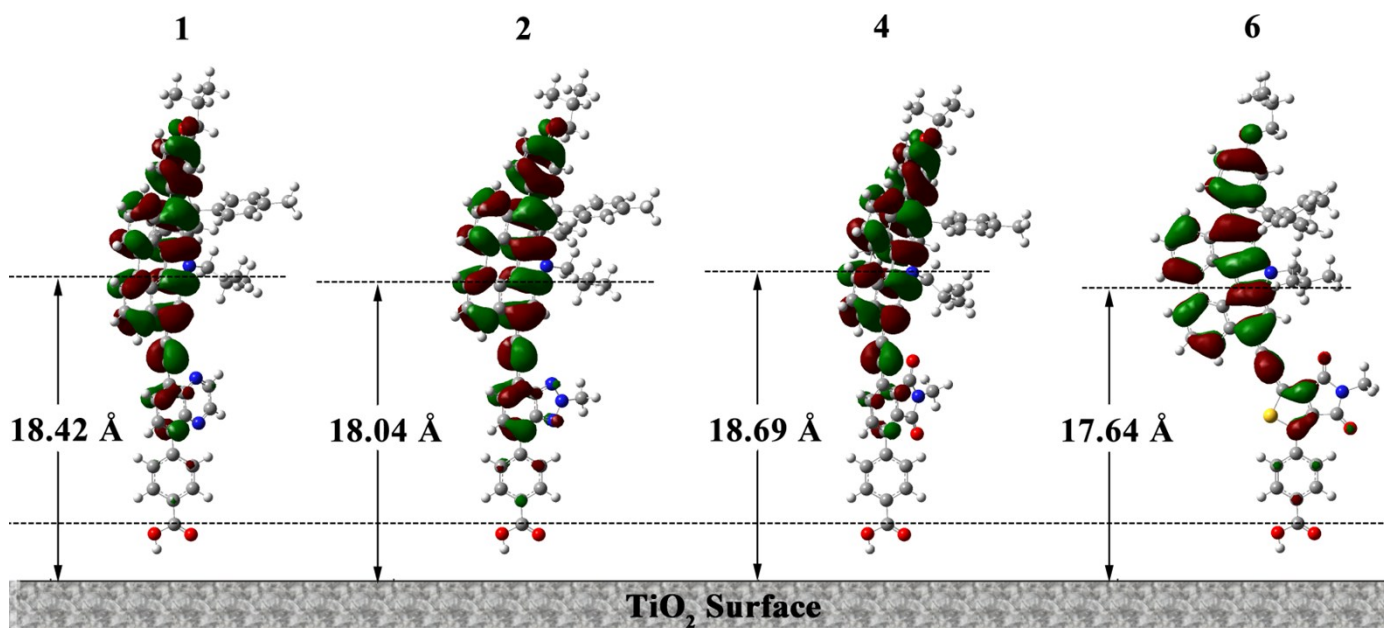

**Fig. S2.** The distance between dye cation hole and  $\text{TiO}_2$  surface of dyes **1**, **2**, **4** and **6**.

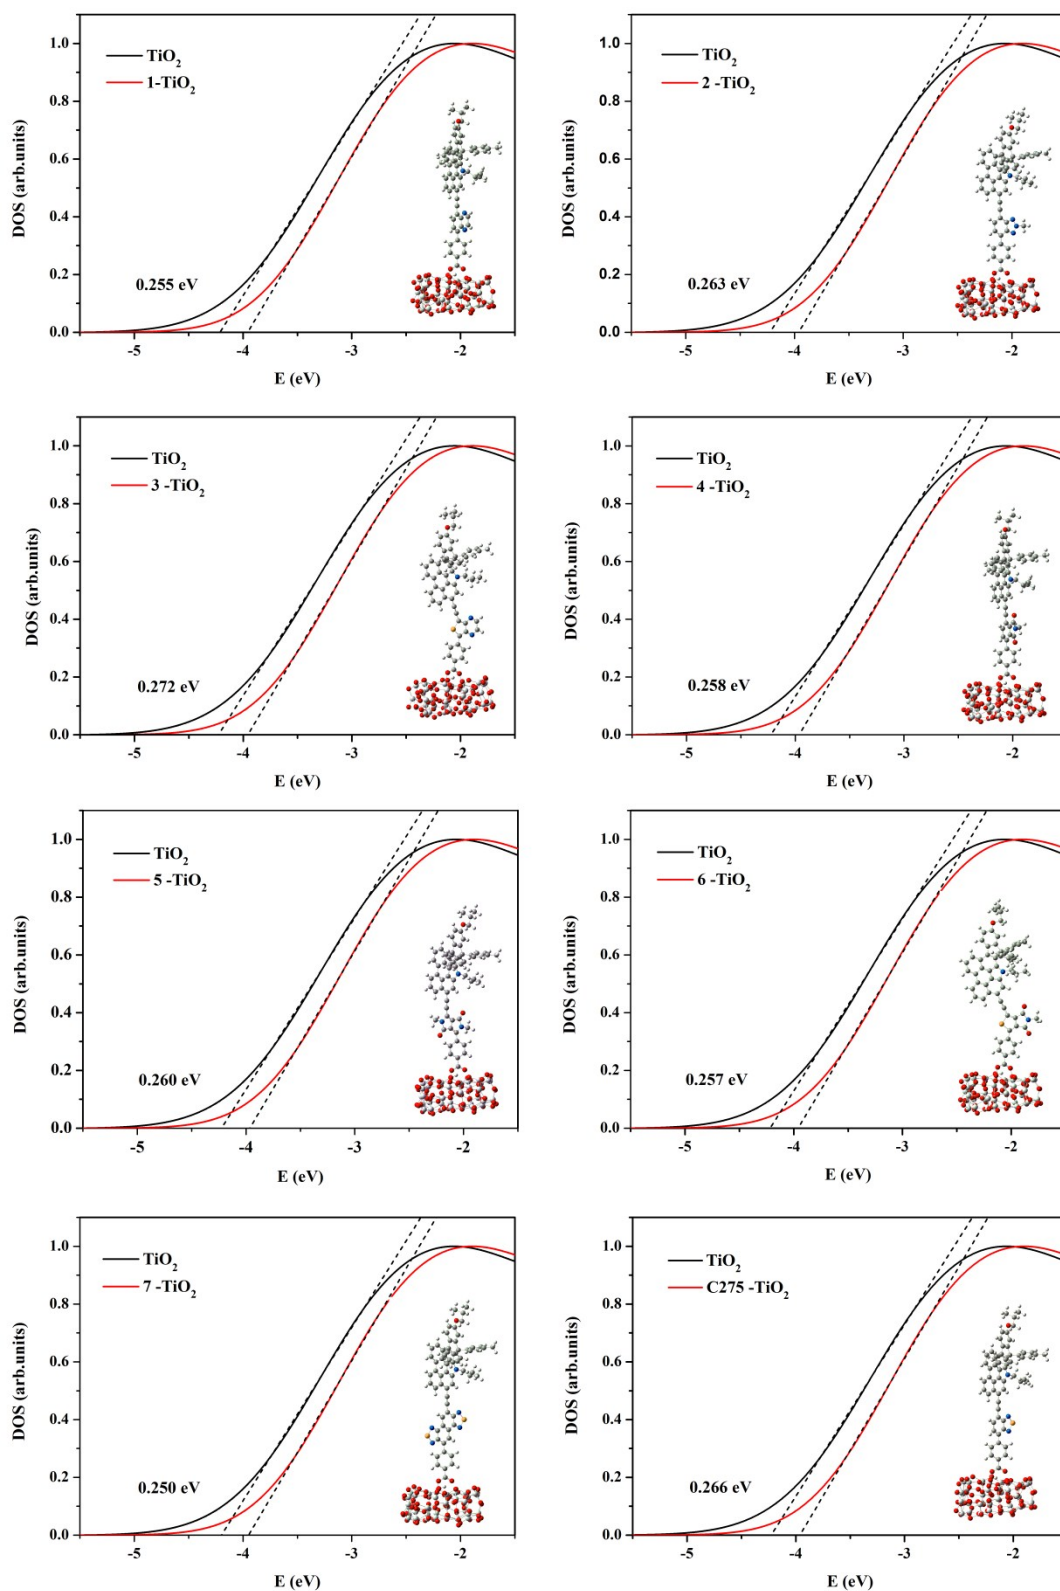

**Fig. S3.** Total and Partial Density of State (DOS) profiles for dyes **1-7** and **C275** adsorbed on  $(\text{TiO}_2)_{38}$  cluster. The dash line intercepts with the energy axis correspond to calculated  $E_{\text{CB}}$  edges.
